# Supplementary material for: IL-13 is a driver of COVID-19 severity
Source: JCI journal article supplement (doi:10.1172/jci.insight.150107), 2021-06-29
Supplement: sd1 [file 1]

You are being redirected.
